# Supplementary material for: Mapping the Hsp90 Genetic Network Reveals Ergosterol Biosynthesis and Phosphatidylinositol-4-Kinase Signaling as Core Circuitry Governing Cellular Stress
Source: PubMed Central journal article supplement (PMC4920384; doi:10.1371/journal.pgen.1006142), 2016-06-24

DIC

Rhodamine

*tetO-STT4/  
stt4Δ  
+Dox*

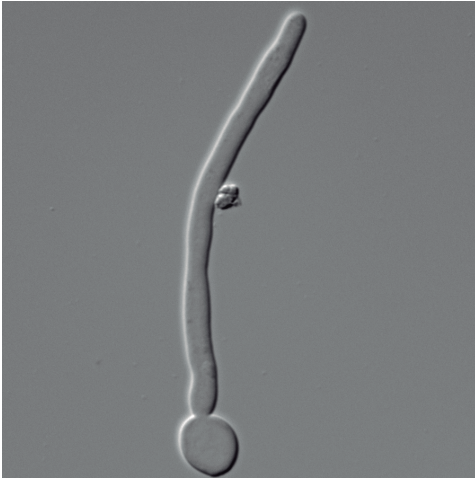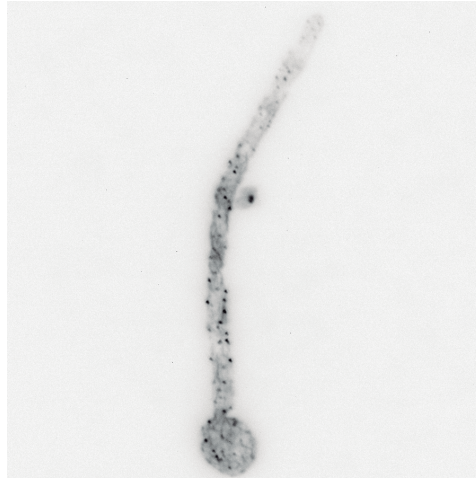

*tetO-STT4/  
stt4Δ  
No Dox*

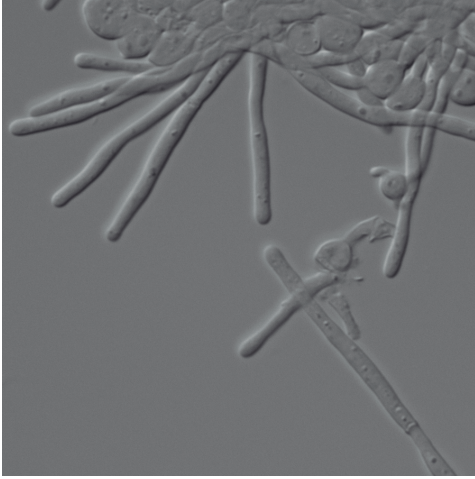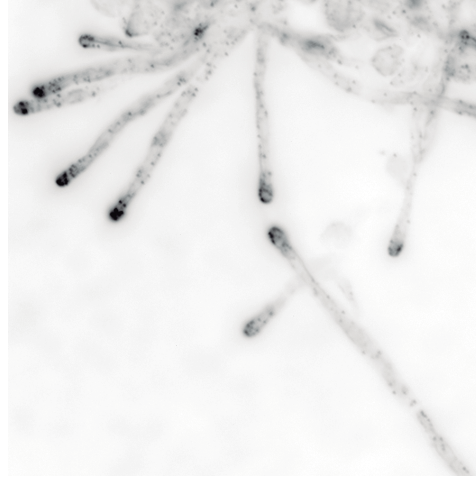

Supplement: pgen.1006142.s009.pdf [file pgen.1006142.s009.pdf]
