# Supplementary material for: Mapping the Hsp90 Genetic Network Reveals Ergosterol Biosynthesis and Phosphatidylinositol-4-Kinase Signaling as Core Circuitry Governing Cellular Stress
Source: PubMed Central journal article supplement (PMC4920384; doi:10.1371/journal.pgen.1006142), 2016-06-24

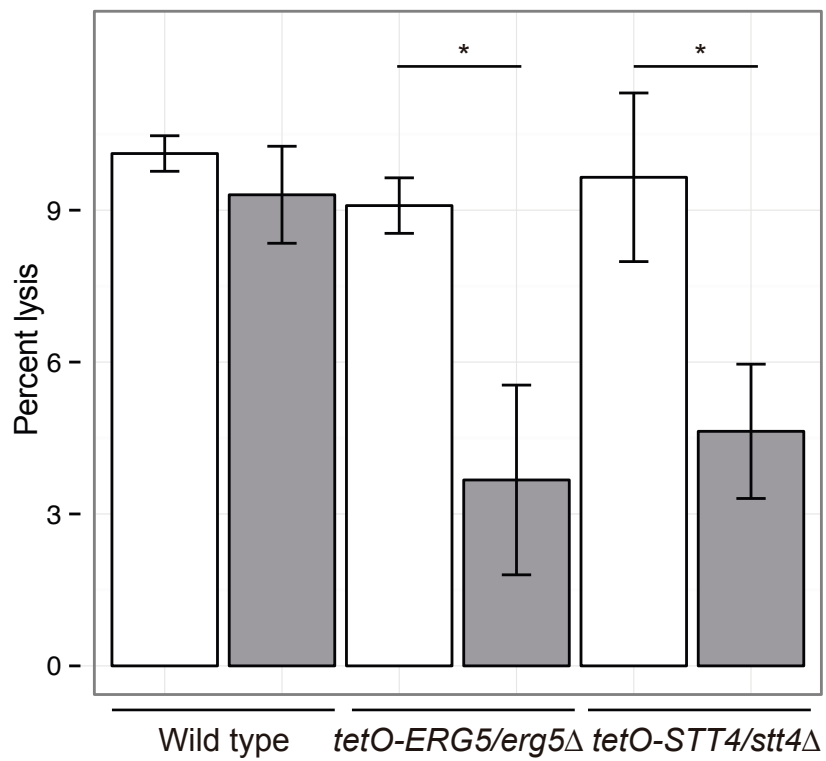

Supplement: pgen.1006142.s010.pdf [file pgen.1006142.s010.pdf]
