# Supplementary material for: Mapping the Hsp90 Genetic Network Reveals Ergosterol Biosynthesis and Phosphatidylinositol-4-Kinase Signaling as Core Circuitry Governing Cellular Stress
Source: PLoS Genet. 2016 Jun 24;12(6):e1006142. doi: 10.1371/journal.pgen.1006142 (PMC4920384; doi:10.1371/journal.pgen.1006142)
Supplement: S1 Table — (XLSX) [file pgen.1006142.s001.xlsx]

## Sheet: Sheet1
Name	orf	condition
ACE2	orf19.6124	41C
ACE2	orf19.6124	Flu
AHR1	orf19.7381	Flu
ALG3	orf19.1092	41C
ARG81	orf19.4766	NaCl
ASG1	orf19.166	C
AXL1	orf19.7342	C
AZF1	orf19.173	C
AZF1	orf19.173	T
BCR1	orf19.723	Flu
BCR1	orf19.723	NaCl
CAS5	orf19.4670	41C
CAS5	orf19.4670	C
CAS5	orf19.4670	NaCl
CAS5	orf19.4670	T
CAT8	orf19.5097	NaCl
CDA2	orf19.7503	NaCl
CDC10	orf19.548	41C
CDC10	orf19.548	C
CDC10	orf19.548	T
CFL2	orf19.1264	T
CHK1	orf19.896	T
CIS2	orf19.6053	C
CMR3	orf19.217	C
CRH12	orf19.3966	C
CSR1	orf19.3794	T
CTA4	orf19.7374	C
CTR2	orf19.4720	C
CUL3	orf19.7497	NaCl
DFG10	orf19.209	T
DPL1	orf19.6951	C
DUN1	orf19.4002	C
DUR35	orf19.5915	C
EAR1	orf19.2703	T
ECM17	orf19.5477	C
ECM4	orf19.2613	C
ENA21	orf19.5170	C
ERJ5	orf19.641	T
FAD2	orf19.118	T
FGR17	orf19.5729	C
FGR2	orf19.7071	C
FGR27	orf19.6680	C
FGR27	orf19.6680	NaCl
FRE3	orf19.1270	Flu
FUN26	orf19.4174	41C
GDE1	orf19.3936	C
GEP3	orf19.6736	C
GIS2	orf19.3182	T
GLN2	orf19.3912	C
GLN2	orf19.3912	NaCl
GPD2	orf19.691	C
GZF3	orf19.2842	NaCl
GZF3	orf19.2842	T
HAL9	orf19.3190	C
HEX1	orf19.6673	C
HMS1	orf19.921	C
HMS1	orf19.921	NaCl
HUL4	orf19.5892	C
HYR3	orf19.575	C
ICE2	orf19.698	C
IHD1	orf19.5760	Flu
JHD2	orf19.5651	C
KAP114	orf19.7086	C
KAP114	orf19.7086	NaCl
KEX1	orf19.7020	NaCl
KIC1	orf19.191	41C
KIN2	orf19.7510	T
KIP3	orf19.7353	NaCl
KRE5	orf19.290	NaCl
LCL3	orf19.5014	C
LDH1	orf19.782	T
LRO1	orf19.6018	C
LYS144	orf19.5380	C
MAC1	orf19.7068	C
MID1	orf19.3212	T
MRR1	orf19.7372	C
MSB2	orf19.1490	C
MSB2	orf19.1490	T
MSC1	orf19.7310	NaCl
MSN4	orf19.4752	NaCl
OCH1	orf19.7391	41C
OFI1	orf19.4972	C
OPT7	orf19.5673	C
orf19.1124	orf19.1124	41C
orf19.1124	orf19.1124	T
orf19.1276	orf19.1276	T
orf19.194	orf19.194	C
orf19.194	orf19.194	Flu
orf19.194	orf19.194	T
orf19.2217	orf19.2217	T
orf19.267	orf19.267	NaCl
orf19.2730	orf19.2730	C
orf19.3335	orf19.3335	T
orf19.3982	orf19.3982	C
orf19.4011	orf19.4011	C
orf19.4658	orf19.4658	C
orf19.4758	orf19.4758	41C
orf19.4984	orf19.4984	C
orf19.529	orf19.529	T
orf19.5326	orf19.5326	C
orf19.584	orf19.584	C
orf19.5874	orf19.5874	C
orf19.6245	orf19.6245	C
orf19.6348	orf19.6348	C
orf19.6530	orf19.6530	C
orf19.6578	orf19.6578	C
orf19.6592	orf19.6592	C
orf19.6874	orf19.6874	NaCl
PCP1	orf19.1643	C
PEP12	orf19.4292	NaCl
PEP8	orf19.6927	NaCl
PPG1	orf19.11256	NaCl
PUN1	orf19.6741	C
PUN1	orf19.6741	NaCl
RAX1	orf19.5903	C
RBE1	orf19.7218	C
RBE1	orf19.7218	NaCl
RIM101	orf19.7247	T
RIM9	orf19.101	T
RLM1	orf19.4662	C
RTK1	orf19.6980	C
SAP8	orf19.242	C
SAP98	orf19.852	C
SCY1	orf19.764	T
SKN7	orf19.971	C
SLT2	orf19.7523	NaCl
SNQ2	orf19.5759	C
SPS20	orf19.4157	C
SSK2	orf19.11257	NaCl
SSN3	orf19.794	T
SSN6	orf19.6798	C
STB5	orf19.3308	C
STP4	orf19.909	C
SWI4	orf19.4545	T
TDA9	orf19.5026	NaCl
TEA1	orf19.6985	C
TEA1	orf19.6985	NaCl
TEC1	orf19.5908	C
TEC1	orf19.5908	NaCl
TIP120	orf19.6729	T
TRY4	orf19.5975	NaCl
TUS1	orf19.6842	C
UBR1	orf19.2695	T
UGA32	orf19.6038	C
UGA32	orf19.6038	NaCl
UGA33	orf19.7317	C
UGA33	orf19.7317	NaCl
ULP2	orf19.4353	NaCl
UPC2	orf19.391	C
WOR2	orf19.5992	C
XOG1	orf19.10507	NaCl
YBR056W	orf19.7214	NaCl
YHR202W	orf19.5342	C
YJR107W	orf19.4678	C
YKL070W	orf19.7098	C
YKR070W	orf19.449	C
YOX1	orf19.7017	NaCl
YPQ1	orf19.7370	NaCl
ZCF1	orf19.255	C
ZCF13	orf19.2646	NaCl
ZCF14	orf19.2647	NaCl
ZCF15	orf19.2753	T
ZCF19	orf19.3876	C
ZCF2	orf19.431	C
ZCF2	orf19.431	Flu
ZCF2	orf19.431	NaCl
ZCF24	orf19.4524	NaCl
ZCF24	orf19.4524	T
ZCF26	orf19.4573	C
ZCF29	orf19.5133	Flu
ZCF29	orf19.5133	NaCl
ZCF3	orf19.1168	C
ZCF30	orf19.5251	NaCl
ZCF32	orf19.5940	C
ZCF32	orf19.5940	T
ZCF7	orf19.1685	C
