# Supplementary material for: Mapping the Hsp90 Genetic Network Reveals Ergosterol Biosynthesis and Phosphatidylinositol-4-Kinase Signaling as Core Circuitry Governing Cellular Stress
Source: PLoS Genet. 2016 Jun 24;12(6):e1006142. doi: 10.1371/journal.pgen.1006142 (PMC4920384; doi:10.1371/journal.pgen.1006142)
Supplement: S2 Table — N/A indicates that the mutant was not available in our libraries. (XLSX) [file pgen.1006142.s002.xlsx]

## Sheet: Sheet1
PI biosynthetic genes in C. albicans
	Gene name	orf	putative function	Library	MIC in GdA (uM)
	STT4	orf19.1814	PI4 kinase	Noble	0.375
	INP51	orf19.1373	PI4,5 phosphatase	Noble	6
	VPS34	orf19.6243	PI3 kinase	Mitchell	6
	PIKA	orf19.3199	PI4 kinase	this study	3
	YMR1	orf19.4744	PI3 phosphatase	N/A	N/A
	LSB6	orf19.2447	PI4 kinase	N/A	N/A
	MSS4	orf19.3153	PI4P5 kinase	N/A	N/A
	INP52	orf19.7052	PI4,5 phosphatase	N/A	N/A
	SAC1	orf19.4865	PI phosphatase	N/A	N/A
	FIG4	orf19.5586	PI[3,5]P phosphatase	N/A	N/A
PH domain proteins and other proteins with predicted PI4P binding in C. albicans
	Strain name	orf		Library	MIC in GdA (uM)
	CASS1	GRACE parental strain		GRACE	6
	DCP1	orf19.423		GRACE	6
	YRB1	orf19.7477		GRACE	6
	BEM3	orf19.2771		GRACE	6
	NVJ2	orf19.1285		GRACE	6
	VPS36	orf19.795		GRACE	6
	BOI2	orf19.3230		GRACE	6
	TFB1	orf19.5297		GRACE	6
	ROM2	orf19.906		GRACE	6
	YHR131C	orf19.6660		GRACE	6
	SLM2	orf19.3505		GRACE	6
	CDC24	orf19.3174		GRACE	6
	WAL1	orf19.6598		GRACE	0.75
	POB3	orf19.1560		GRACE	6
	CDC10	orf19.548		GRACE	6
	CDC11	orf19.5691		GRACE	6
	CDC12	orf19.3013		GRACE	6
	EGD2	orf19.5858		GRACE	6
	GGA2	orf19.3006		GRACE	6
	RGD1	orf19.2443		GRACE	6
	SEC2	orf19.4928		GRACE	essential
	RGA2	orf19.4593		GRACE	6
	DAY182	Mitchell parental strain		Mitchell	6
	BEM2	orf19.6573		Mitchell	6
	BPH1	orf19.6261		Mitchell	6
	INT1	orf19.4257		Mitchell	6
	CBK1	orf19.4909		Mitchell	6
	SIP3	orf19.3047		Mitchell, GRACE	6
	SN250	Noble parental strain		Noble	6
	OSH3	orf19.1317		Noble	1.5
	TUS1	orf19.6842		Noble	6
	orf19.1514	orf19.1514		N/A	N/A
	KES1	orf19.6883		N/A	N/A
	ATG26	orf19.2616		N/A	N/A
	YRB2	orf19.3583		N/A	N/A
	PSY2	orf19.3685		N/A	N/A
	SLM1	orf19.4043		N/A	N/A
	orf19.4245	orf19.4245		N/A	N/A
	NUM11	orf19.4715		N/A	N/A
	OSH2	orf19.5095		N/A	N/A
	SKG3	orf19.5274		N/A	N/A
	PLC1	orf19.5506		N/A	N/A
	NUP2	orf19.6665		N/A	N/A
*N/A indicates mutants were not available
