# Supplementary material for: Mapping the Hsp90 Genetic Network Reveals Ergosterol Biosynthesis and Phosphatidylinositol-4-Kinase Signaling as Core Circuitry Governing Cellular Stress
Source: PLoS Genet. 2016 Jun 24;12(6):e1006142. doi: 10.1371/journal.pgen.1006142 (PMC4920384; doi:10.1371/journal.pgen.1006142)
Supplement: S3 Table — (XLSX) [file pgen.1006142.s003.xlsx]

## Sheet: Sheet1
Stress condition	Screening condition	incubation time (days)
no stress	37C	2
high temperature	41C	4
osmotic stress	0.4 M NaCL	3
unfolded protein stress	1 ug/mL tunicamycin	5
cell wall stress	0.1 ug/mL caspofungin	9
membrane stress	0.1 ug/mL fluconazole	3
