# Supplementary material for: Mapping the Hsp90 Genetic Network Reveals Ergosterol Biosynthesis and Phosphatidylinositol-4-Kinase Signaling as Core Circuitry Governing Cellular Stress
Source: PLoS Genet. 2016 Jun 24;12(6):e1006142. doi: 10.1371/journal.pgen.1006142 (PMC4920384; doi:10.1371/journal.pgen.1006142)
Supplement: S4 Table — (XLSX) [file pgen.1006142.s004.xlsx]

## Sheet: Sheet1
Primer	Description	Sequence
oLC4020	Ypp1 deletion F	AGCAAGTACACATCCTATTAAGTTGATCTTTTATTTTGG-CTTTTAATTATTTTAATTCCCAACATTATAGGGAAACAG-CTATGACCATG
oLC4021	Ypp1 deletion R	CTTTCTGTACATATTTTATTGATTTTTTATATATTCTCCT-TTTTTGATAGTCTGTTTCGCTCTTTGTCTAGTAAAACGA-CGGCCAGTGAG
oLC4022	Ypp1 KO integration F	CCCATATCGTCATTATAAAC
oLC4023	Ypp1 KO Integration R	GGTTCAATGTCAGTCATAG
oLC4054	Ypp1 deletion confirmation	GTTACGATGAGAAATTGTAC
oLC4055	Ypp1 deletion confirmation	GTACATAACTCAATGATTCG
oLC4024	Efr3 deletion F	TTACTTCTTTTCTATTGGTTAATTAAATCCTGTTTTGATTCAATAGTTTCTTCAACTTCCAGATCCAAGAGGAAACAGCTATGACCATG
oLC4025	Efr3 deletion R	AAATGTTCCTTTTACCTAGAAAGGTATTTTGACTTGGGTATCTTTGCAACTGTCTCTCTCTCGCTTTAGCGTAAAACGACGGCCAGTG
oLC4026	Efr3 KO integration F	CAGATATGAGATTTGAGTAG
oLC4027	Efr3 KO Integration R	GATCCTAGAGAAATTGCTTC
oLC4052	Efr3 deletion confirmation	ATATCTTGCAACTGATTGCC
oLC4053	Efr3 deletion confirmation	TTTGCAGATGAGCACGTGAC
oLC274	NAT-F	CTGTCAAGGAGGGTATTCTGG
oLC275	NAT-R	AAAGTCAAAGTTCCAAGGGG
oLC3401	FLAG-Stt4 tagging F	GAAATTACCTTGTTGGGATAAGAATTAAGAAGTTATTA-ATTAAATCAATCACGTGCATTCTCCACTTTTAGGAAAC-AGCTATGACCATGA
oLC3402	FLAG-Stt4 tagging R	ACCGTCAATTCGGCCAATTTCTTAAGGGCTTCAGCACG-AATTGAGCCACGGGTAATCCCAGAATAATCCATTAAAC-CACCTTTATCATCA
oLC3403	FLAG-Stt4 integration upstream F	TGCTCAACCAGATGCTATTG
oLC3404	FLAG-Stt4 integration downstream R	CTTCAGATAATCTATCACGA
oLC3390	tetO-Hsp90 F	GAAGAAGTGGTGATATGAGAAACAACCACCAGCAGCG-CCACCAGCAGCACCATATTACTACCTATAACAGGGAAA-CAGCTATGACCATG
oLC3220	tetO-Hsp90 R	TAATGATCAAAGACATCAACTGAGAGATCTCAGCAGT-GAATTCGTGAGTTTCAACTTTTGCGTCAGCCATCGACT-ATTTATATTTGTATG
oLC276	Hsp90 KO upstream R	GAGATGGCAAATCGTTAGG
oLC277	Hsp90 KO downstream R	CCACCCTGAACCTAATTTGG
oLC300	tetO-Hsp90 upstream F	ATAAGAATGCGGCCGCGTTTGGTTCAGCACCTTGTCG
oLC408	tetO-Hsp90 upstream R	AACAATCTCAACATGGTACC
oLC294	tetO-Hsp90 downstream F	CGGGGTACCGATTTCAGGTTGAAGAATTTGC
oLC534	tetO-Hsp90 downstream R	GATGGAGATAGTTTACGG
oLC297	Hsp90 promoter replacement confirmation	CCCGAGCTCTCAGCACCAGCACTTAAAGC
oLC4629	Pikalpha deletion F	GAACGAAGAAATCCAACAGTATTATTTTCACTACATCATCAATACACTGAACCTTATAATTTTTGCAAATGGGAAACAGCTATGACCATG
oLC4630	Pikalpha deletion R	TGTTAAAAAATGCATCAATTTTTTTTGCATGTGCTTTCTCGTATTTATAATTTGATATTAAATAGCAAACTCTAGTAAAACGACGGCCAG
oLC4632	pikalpha KO integration upstream	ACCGCACGATCAGCTTATAC
oLC4633	pikalpha KO Integration downstream	CTCCGTGGTTTCCTATTCAGC
oLC4685	pikalpha deletion confirmation	GGACTACTAAATGCACTGGCG
