# Supplementary material for: Mapping the Hsp90 Genetic Network Reveals Ergosterol Biosynthesis and Phosphatidylinositol-4-Kinase Signaling as Core Circuitry Governing Cellular Stress
Source: PLoS Genet. 2016 Jun 24;12(6):e1006142. doi: 10.1371/journal.pgen.1006142 (PMC4920384; doi:10.1371/journal.pgen.1006142)
Supplement: S5 Table — (XLSX) [file pgen.1006142.s005.xlsx]

## Sheet: Sheet1
Supplementary Table 3: Strains used in this study
Strain ID	Strain name	Genotype	Source
CaLC2302	SN250 Wild type	his1 /his1, leu2 ::C.dubliniensis HIS1 /leu2 ::C.maltosa LEU2, arg4 /arg4 , URA3/ura3 ::imm434, IRO1/iro1 ::imm434	(Noble et al., 2010)
CaLC2740	Wild type	arg4 /arg4 , leu2 /leu2 ::LEU2(Ca), his1 /his1 ::HIS1(Ca), URA3/ura3 , IRO1/iro1	(Homann et al., 2009)
CaLC2858	stt4Δ/Δ	his1/his1, leu2/leu2, arg4 /arg4 , URA3/ura3 ::imm434, IRO1/iro1 ::imm434 stt4::C.dubliniensis HIS1/stt4::C.maltosa LEU2	(Noble et al., 2010)
CaLC2891	erg5Δ/Δ	his1/his1, leu2/leu2, arg4 /arg4 , URA3/ura3 ::imm434, IRO1/iro1 ::imm434 erg5::C.dubliniensis HIS1/erg5::C.maltosa LEU2	(Noble et al., 2010)
CaLC4387	snt1Δ/Δ	his1/his1, leu2/leu2, arg4 /arg4 , URA3/ura3 ::imm434, IRO1/iro1 ::imm434 snt1::C.dubliniensis HIS1/snt1::C.maltosa LEU2	(Noble et al., 2010)
	kex2Δ/Δ	his1/his1, leu2/leu2, arg4 /arg4 , URA3/ura3 ::imm434, IRO1/iro1 ::imm434 kex2::C.dubliniensis HIS1/kex2::C.maltosa LEU2	(Noble et al., 2010)
	eng1Δ/Δ	his1/his1, leu2/leu2, arg4 /arg4 , URA3/ura3 ::imm434, IRO1/iro1 ::imm434 eng1::C.dubliniensis HIS1/eng1::C.maltosa LEU2	(Noble et al., 2010)
	mig2Δ/Δ	his1/his1, leu2/leu2, arg4 /arg4 , URA3/ura3 ::imm434, IRO1/iro1 ::imm434 mig2::C.dubliniensis HIS1/mig2::C.maltosa LEU2	(Noble et al., 2010)
	pep8Δ/Δ	his1/his1, leu2/leu2, arg4 /arg4 , URA3/ura3 ::imm434, IRO1/iro1 ::imm434 mig2::C.dubliniensis HIS1/mig2::C.maltosa LEU2	(Noble et al., 2010)
	gzf3Δ/Δ	his1/his1, leu2/leu2, arg4 /arg4 , URA3/ura3 ::imm434, IRO1/iro1 ::imm434 gzf3::C.dubliniensis HIS1/gzf3::C.maltosa LEU2	(Noble et al., 2010)
	gzf3Δ/Δ	arg4 /arg4 leu2 /leu2 his1 /his1 URA3/ura3 ::imm434 IRO1/iro1 ::imm434 gzf3::ARG4/gzf3::LEU2	(Homann et al., 2009)
	nag1Δ/Δ	his1/his1, leu2/leu2, arg4 /arg4 , URA3/ura3 ::imm434, IRO1/iro1 ::imm434 nag1::C.dubliniensis HIS1/nag1::C.maltosa LEU2	(Noble et al., 2010)
	orf19.998Δ/Δ	his1/his1, leu2/leu2, arg4 /arg4 , URA3/ura3 ::imm434, IRO1/iro1 ::imm434 bsp1::C.dubliniensis HIS1/bsp1::C.maltosa LEU2	(Noble et al., 2010)
	pga49Δ/Δ	his1/his1, leu2/leu2, arg4 /arg4 , URA3/ura3 ::imm434, IRO1/iro1 ::imm434 pga49::C.dubliniensis HIS1/pga49::C.maltosa LEU2	(Noble et al., 2010)
	orf19.529Δ/Δ	his1/his1, leu2/leu2, arg4 /arg4 , URA3/ura3 ::imm434, IRO1/iro1 ::imm434 orf19.529::C.dubliniensis HIS1/orf19.529::C.maltosa LEU2	(Noble et al., 2010)
	kin2Δ/Δ	his1/his1, leu2/leu2, arg4 /arg4 , URA3/ura3 ::imm434, IRO1/iro1 ::imm434 kin2::C.dubliniensis HIS1/kin2::C.maltosa LEU2	(Noble et al., 2010)
	och1Δ/Δ	his1/his1, leu2/leu2, arg4 /arg4 , URA3/ura3 ::imm434, IRO1/iro1 ::imm434 och1::C.dubliniensis HIS1/och1::C.maltosa LEU2	(Noble et al., 2010)
	mkc1Δ/Δ	his1/his1, leu2/leu2, arg4 /arg4 , URA3/ura3 ::imm434, IRO1/iro1 ::imm434 mkc1::C.dubliniensis HIS1/mkc1::C.maltosa LEU2	(Noble et al., 2010)
	cdc10Δ/Δ	his1/his1, leu2/leu2, arg4 /arg4 , URA3/ura3 ::imm434, IRO1/iro1 ::imm43 cdc10::C.dubliniensis HIS1/cdc10::C.maltosa LEU2	(Noble et al., 2010)
	zcf14Δ/Δ	arg4 /arg4 leu2 /leu2 his1 /his1 URA3/ura3 ::imm434 IRO1/iro1 ::imm434 zcf14::ARG4/zcf14::LEU2	(Homann et al., 2009)
	ulp2Δ/Δ	his1/his1, leu2/leu2, arg4 /arg4 , URA3/ura3 ::imm434, IRO1/iro1 ::imm43 ulp2::C.dubliniensis HIS1/ulp2::C.maltosa LEU2	(Noble et al., 2010)
	orf19.2703Δ/Δ	his1/his1, leu2/leu2, arg4 /arg4 , URA3/ura3 ::imm434, IRO1/iro1 ::imm43 ear1::C.dubliniensis HIS1/ear1::C.maltosa LEU2	(Noble et al., 2010)
	cas5Δ/Δ	his1/his1, leu2/leu2, arg4 /arg4 , URA3/ura3 ::imm434, IRO1/iro1 ::imm43 cas5::C.dubliniensis HIS1/cas5::C.maltosa LEU2	(Noble et al., 2010)
	ppg1Δ/Δ	his1/his1, leu2/leu2, arg4 /arg4 , URA3/ura3 ::imm434, IRO1/iro1 ::imm43 ppg1::C.dubliniensis HIS1/ppg1::C.maltosa LEU2	(Noble et al., 2010)
	kre5Δ/Δ	his1/his1, leu2/leu2, arg4 /arg4 , URA3/ura3 ::imm434, IRO1/iro1 ::imm43 kre5::C.dubliniensis HIS1/kre5::C.maltosa LEU2	(Noble et al., 2010)
	kic1Δ/Δ	his1/his1, leu2/leu2, arg4 /arg4 , URA3/ura3 ::imm434, IRO1/iro1 ::imm43 kic1::C.dubliniensis HIS1/kic1::C.maltosa LEU2	(Noble et al., 2010)
	osh3Δ/Δ	his1/his1, leu2/leu2, arg4 /arg4 , URA3/ura3 ::imm434, IRO1/iro1 ::imm43 osh3::C.dubliniensis HIS1/osh3::C.maltosa LEU2	(Noble et al., 2010)
CaLC239	SN95 Wild type	arg4 /arg4 his1 /his1 URA3/ura3 ::imm434 IRO1/iro1 ::imm434	(Noble et al., 2005)
CaLC3385	tetO-HSP90/hsp90Δ	As CaLC239, tetO-HSP90/hsp90::FRT	This study
CaLC4047	HSP90/hsp90Δ, stt4Δ/Δ	As CaLC2858, HSP90/hsp90::FRT	This study
CaLC4087	tetO-HSP90/hsp90Δ, stt4Δ/Δ	As CaLC2858, tetO-HSP90/hsp90::FRT	This study
CaLC4046	HSP90/hsp90Δ, erg5Δ/Δ	As CaLC2891, HSP90/hsp90::FRT	This study
CaLC4086	tetO-HSP90/hsp90Δ, erg5Δ/Δ	As CaLC2891, tetO-HSP90/hsp90::FRT	This study
CaLC4046	HSP90/hsp90Δ, snt1Δ/Δ	As CaLC4387, HSP90/hsp90::FRT	This study
CaLC4086	tetO-HSP90/hsp90Δ, snt1Δ/Δ	As CaLC4387, tetO-HSP90/hsp90::FRT	This study
CaLC4049	tetO-HSP90/hsp90Δ, FLAG-STT4	As CaLC239, tetO-HSP90/hsp90::FRT, STT4/pACT-FLAG-FRT-STT4	This study
CaLC4045	tetO-HSP90/hsp90Δ, ERG5-HA	As CaLC239, tetO-HSP90/hsp90::FRT, ERG5/ERG5-HA-ARG	This study
CaLC4038	ypp1Δ/Δ	As CaLC239, ypp1::FRT/ypp1::FRT	This study
CaLC4040	efr3Δ/Δ	As CaLC239, efr3::FRT/efr3::FRT	This study
CaLC4642	pikalphaΔ/Δ	As CaLC2302, pika::FRT/pka::FRT	This study
CaLC3365	GRACE WT (CaSS1)	See reference	(Roemer et al., 2003)
CaLC4065	tetO-ERG3/erg3Δ	See reference	(Roemer et al., 2003)
CaLC4067	tetO-ERG4/erg4Δ	See reference	(Roemer et al., 2003)
CaLC4069	tetO-ERG5/erg5Δ	See reference	(Roemer et al., 2003)
CaLC4068	tetO-ERG6/erg6Δ	See reference	(Roemer et al., 2003)
CaLC4099	tetO-STT4/stt4Δ	See reference	(Roemer et al., 2003)
	tetO-WAL1/wal1Δ	See reference	(Roemer et al., 2003)
CaLC660	erg3Δ/erg3Δ	arg4/arg4 his1/his1 URA3/ura3::imm434 IRO1/iro1::imm434 CaTAR::HIS3 erg3::FRT/erg3::FRT	(Hill et al., 2013)
