# Supplementary material for: Mapping the Hsp90 Genetic Network Reveals Ergosterol Biosynthesis and Phosphatidylinositol-4-Kinase Signaling as Core Circuitry Governing Cellular Stress
Source: PLoS Genet. 2016 Jun 24;12(6):e1006142. doi: 10.1371/journal.pgen.1006142 (PMC4920384; doi:10.1371/journal.pgen.1006142)
Supplement: S6 Table — (XLSX) [file pgen.1006142.s006.xlsx]

## Sheet: Sheet1
Supplemental Table 4: Plasmids used in this study
Name:	Description:	Reference:
pLC49	NAT deletion	(Morschhauser et al., 1999)
pLC575	C-terminal HA-Arg	(Lavoie et al., 2008)
pLC62	Hsp90 deletion	(Shapiro et al., 2009)
pLC605	tetO promoter replacement	(Park et al., 2005)
pLC620	N-terminal NAT pACT1-FLAG	(Shapiro et al., 2009)
